# Supplementary material for: Design and construction of a microporous metal–organic framework based on the pillared-layer motif
Source: Royal Society of Chemistry journal article supplement (doi:10.1039/b704433j), 2007-01-01
Supplement: b704433j.pdf [file b704433j.pdf]

## Supporting Information

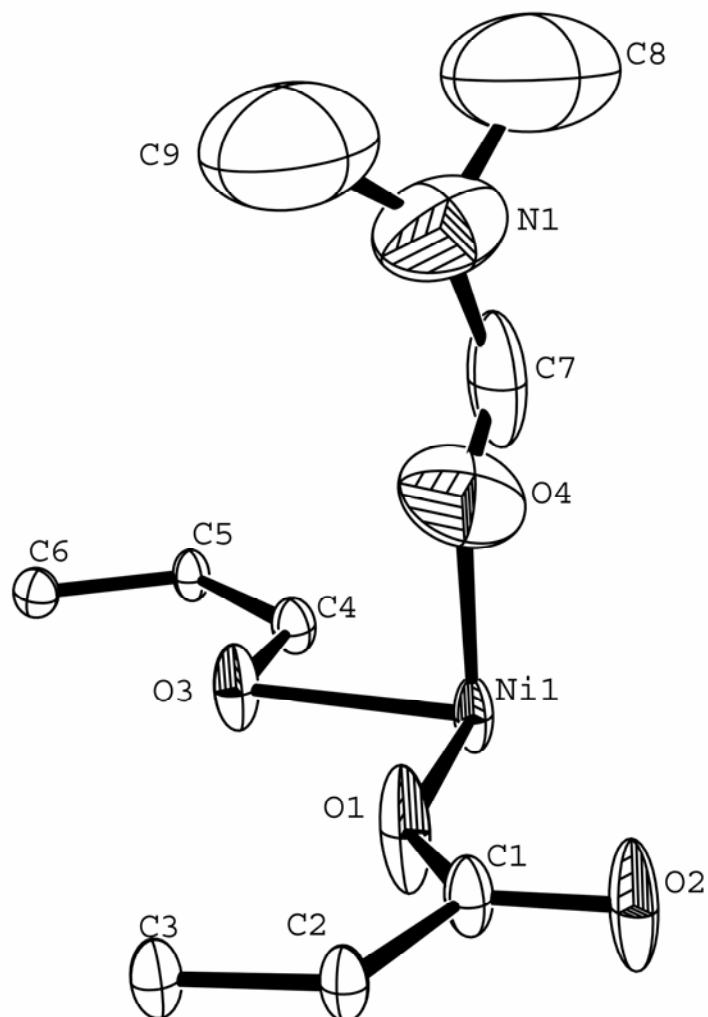

**Fig. S1** ORTEP view of the compound **1** with thermal ellipsoids at 30% level. Disordered part has not been shown for clarity.

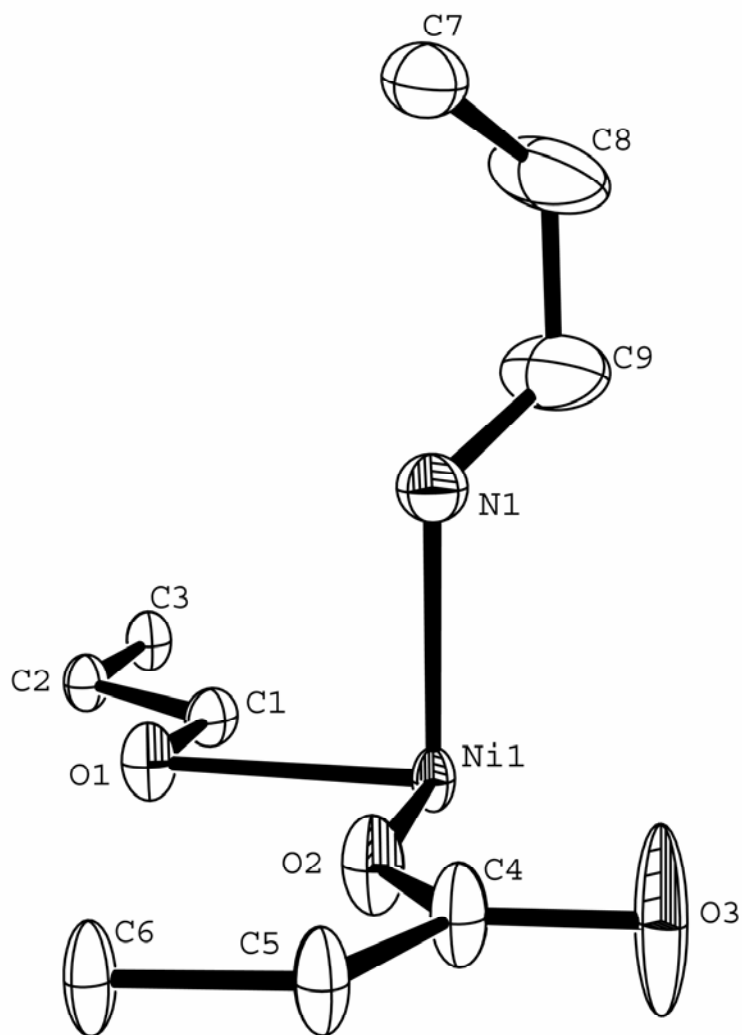

**Fig. S2** ORTEP view of the compound **2** with thermal ellipsoids at 30% level. Disordered part has not been shown for clarity.

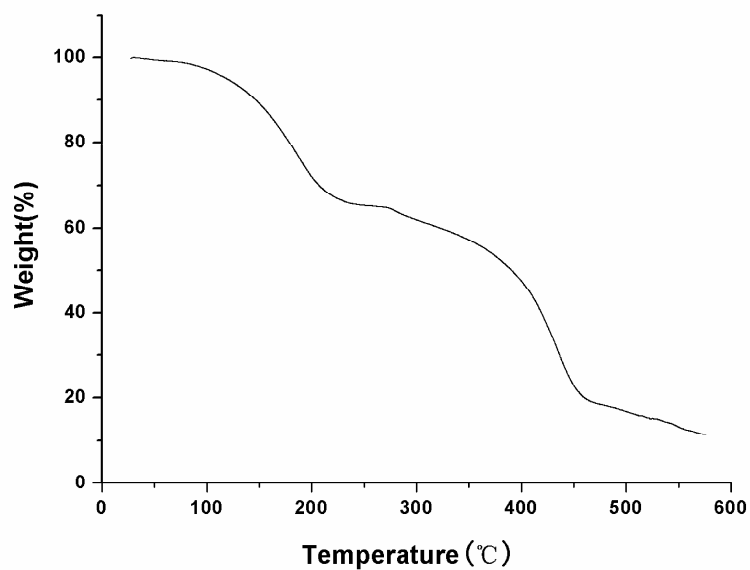

**Fig. S3** TG curve of as-synthesized **2**. Heating rate: 10 deg sec<sup>-1</sup>, N<sub>2</sub> atmosphere temperatures. The TGA curve shows release of guest DMF molecules between that 25 and 235 °C leading to a weight loss of 34.11%, which suggests a pore filling of 3 DMF molecules per Ni centre. Above 235 °C, the sample shows no further weight loss up to 272 °C at which temperature the compound decomposed.

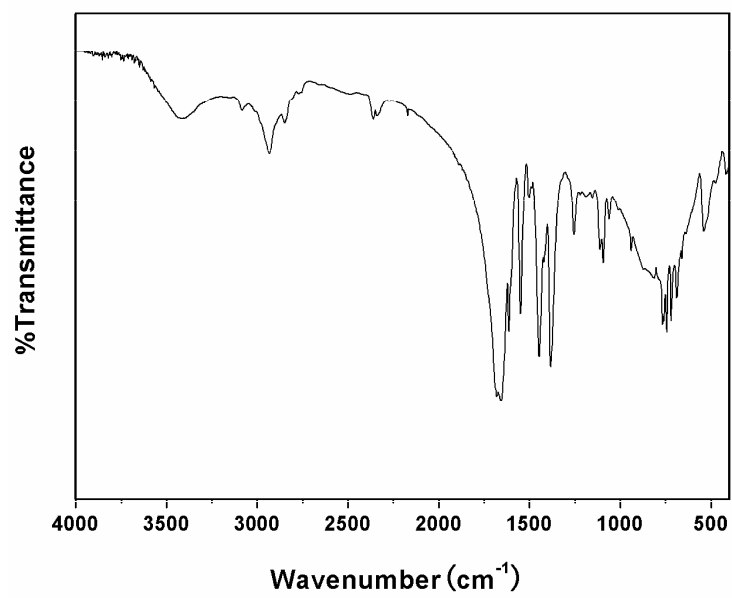

**Fig. S4** FT-IR spectrum of as-synthesized sample **1**.

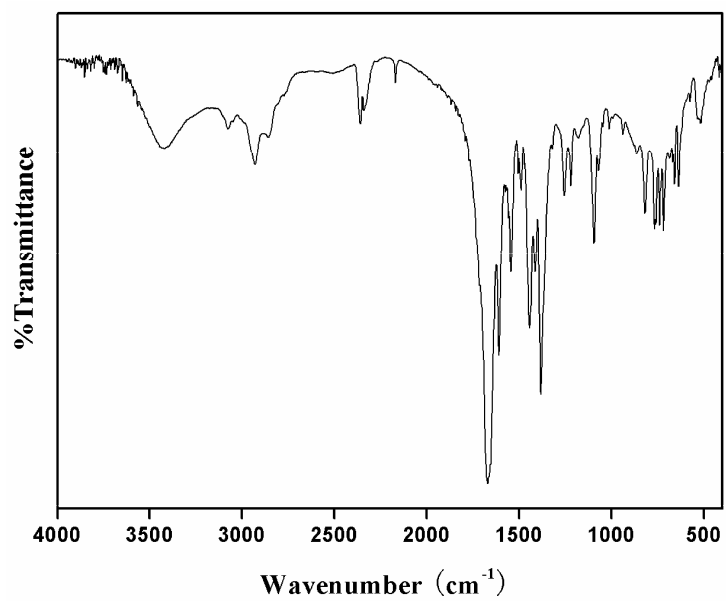

**Fig. S5** FT-IR spectrum of as-synthesized sample **2**.

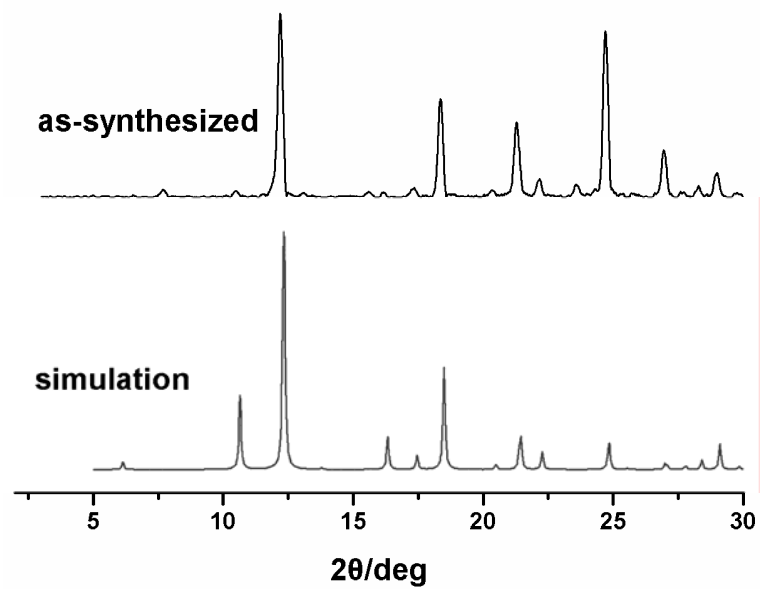

**Fig. S6** XRPD patterns of the as-synthesized samples **1** and the simulation based on the single-crystal data of **1**.

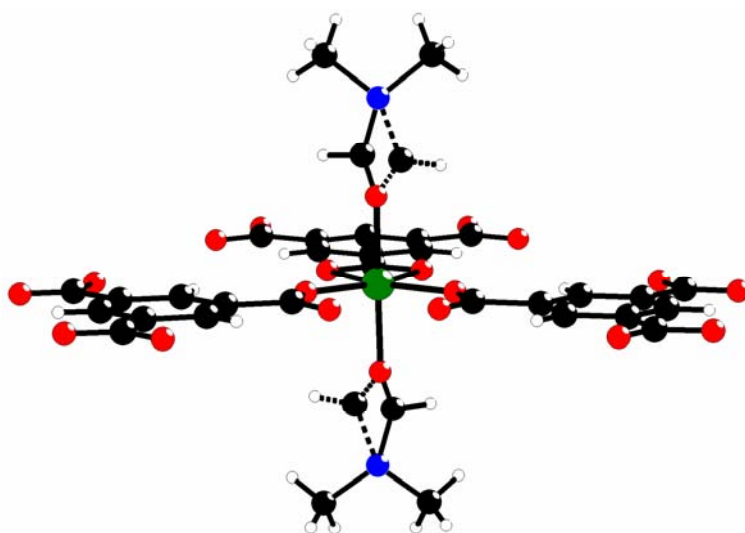

**Fig. S7** The DMF molecules disorder at two positions in **1**.

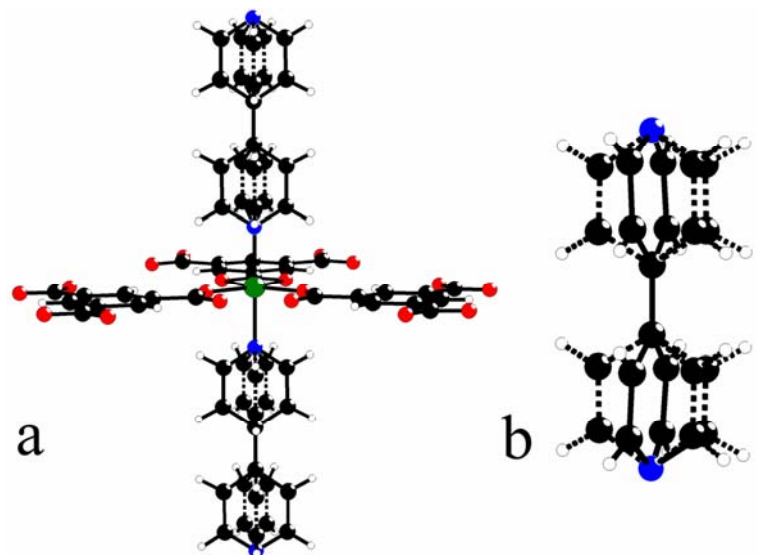

**Fig. S8** 4,4'-bipy ligands disorder at three positions along the threefold axis in compound **2**.
